# Supplementary material
Source: MDPI journal article supplement (https://www.mdpi.com/1999-4907/14/3/642)
Supplement: s1 [file s1]

## Supplementary Material

**Supplementary Table S1.** Most common tree species in different land cover (LC) types and DBH classes.

| LC type                | DBH class (cm)              |                            |                            |                              |                             |                              |                               |
|------------------------|-----------------------------|----------------------------|----------------------------|------------------------------|-----------------------------|------------------------------|-------------------------------|
|                        | 10–19.9                     | 20–29.9                    | 30–39.9                    | 40–49.9                      | 50–59.9                     | 60–69.9                      | ≥ 70                          |
| Bushland               | <i>Acacia mearnsii</i>      | <i>Acacia mearnsii</i>     | <i>Albizia amara</i>       | <i>Albizia amara</i>         | <i>Commiphora africana</i>  | <i>Albizia amara</i>         | <i>Newtonia hildebrandtii</i> |
|                        | <i>Commiphora schimperi</i> | <i>Albizia amara</i>       | <i>Agauria salicifolia</i> | <i>Euphorbia kibwezensis</i> | <i>Albizia amara</i>        | <i>Acacia mearnsii</i>       |                               |
|                        | <i>Acacia tortilis</i>      | <i>Commiphora africana</i> | <i>Acacia mearnsii</i>     | <i>Acacia mearnsii</i>       | <i>Erythrina abyssinica</i> | <i>Agauria salicifolia</i>   |                               |
|                        | <i>Xymalos monospora</i>    | <i>Maesa lanceolata</i>    | <i>Mangifera indica</i>    | <i>Eucalyptus sp.</i>        |                             | <i>Euphorbia kibwezensis</i> |                               |
|                        | <i>Commiphora africana</i>  | <i>Acacia reficiens</i>    | <i>Commiphora incisa</i>   | <i>Mangifera indica</i>      |                             | <i>Erythrina abyssinica</i>  |                               |
| Cropland and homestead | <i>Acacia mearnsii</i>      | <i>Grevillea robusta</i>   | <i>Grevillea robusta</i>   | <i>Grevillea robusta</i>     | <i>Grevillea robusta</i>    | <i>Eucalyptus sp.</i>        | <i>Mangifera indica</i>       |

|              |                              |                              |                              |                             |                          |                          |                           |
|--------------|------------------------------|------------------------------|------------------------------|-----------------------------|--------------------------|--------------------------|---------------------------|
|              | <i>Eriobotrya japonica</i>   | <i>Persea americana</i>      | <i>Eucalyptus sp.</i>        | <i>Eucalyptus sp.</i>       | <i>Eucalyptus sp.</i>    | <i>Ficus thonningii</i>  | <i>Ficus thonningii</i>   |
|              | <i>Grevillea robusta</i>     | <i>Prunus africana</i>       | <i>Persea americana</i>      | <i>Terminalia brownii</i>   | <i>Ficus thonningii</i>  |                          | <i>Ficus ingens</i>       |
|              | <i>Prunus africana</i>       | <i>Maesa lanceolata</i>      | <i>Lannea alata</i>          | <i>Mangifera indica</i>     | <i>Persea americana</i>  |                          | <i>Bersama abyssinica</i> |
|              | <i>Eucalyptus sp.</i>        | <i>Acacia mearnsii</i>       | <i>Jacaranda mimosifolia</i> | <i>Ekebergia capensis</i>   |                          |                          |                           |
| Grassland    | <i>Acacia tortilis</i>       | <i>Acacia tortilis</i>       | <i>Albizia anthelmintica</i> | <i>Acacia tortilis</i>      | <i>Acacia tortilis</i>   | <i>Acacia tortilis</i>   |                           |
|              | <i>Portulacaria afra</i>     | <i>Albizia anthelmintica</i> |                              |                             |                          | <i>Acacia reficiens</i>  |                           |
|              | <i>Acacia senegal</i>        | <i>Portulacaria afra</i>     |                              |                             |                          |                          |                           |
|              | <i>Balanites aegyptiacus</i> |                              |                              |                             |                          |                          |                           |
|              | <i>Acacia mellifera</i>      |                              |                              |                             |                          |                          |                           |
| Mixed forest | <i>Maesa lanceolata</i>      | <i>Maesa lanceolata</i>      | <i>Grevillea robusta</i>     | <i>Cupressus lusitanica</i> | <i>Albizia gummifera</i> | <i>Albizia gummifera</i> | <i>Albizia gummifera</i>  |

|                |                                  |                                  |                                  |                                  |                                  |                             |                                    |
|----------------|----------------------------------|----------------------------------|----------------------------------|----------------------------------|----------------------------------|-----------------------------|------------------------------------|
|                | <i>Cinnamomum camphora</i>       | <i>Cupressus lusitanica</i>      | <i>Albizia gummifera</i>         | <i>Albizia gummifera</i>         | <i>Nuxia floribunda</i>          | <i>Eucalyptus sp.</i>       | <i>Eucalyptus sp.</i>              |
|                | <i>Eucalyptus sp.</i>            | <i>Xymalos monospora</i>         | <i>Tabernaemontana stapfiana</i> | <i>Eucalyptus sp.</i>            | <i>Syzygium guineense</i>        | <i>Millettia oblata</i>     | <i>Xymalos monospora</i>           |
|                | <i>Tabernaemontana stapfiana</i> | <i>Phoenix reclinata</i>         | <i>Nuxia floribunda</i>          | <i>Cussonia spicata</i>          | <i>Cupressus lusitanica</i>      | <i>Syzygium guineense</i>   | <i>Macaranga capensis</i>          |
|                | <i>Xymalos monospora</i>         | <i>Tabernaemontana stapfiana</i> | <i>Cupressus lusitanica</i>      | <i>Grevillea robusta</i>         | <i>Eucalyptus sp.</i>            | <i>Cupressus lusitanica</i> | <i>Pouteria adolfi-friedericii</i> |
| Montane forest | <i>Tabernaemontana stapfiana</i> | <i>Albizia gummifera</i>    | <i>Albizia gummifera</i>           |
|                | <i>Oxyanthus speciosus</i>       | <i>Maesa lanceolata</i>          | <i>Millettia oblata</i>          | <i>Millettia oblata</i>          | <i>Macaranga capensis</i>        | <i>Macaranga capensis</i>   | <i>Chrysophyllum gorungosanum</i>  |
|                | <i>Celtis africana</i>           | <i>Millettia oblata</i>          | <i>Albizia gummifera</i>         | <i>Macaranga capensis</i>        | <i>Albizia gummifera</i>         | <i>Syzygium guineense</i>   | <i>Pouteria adolfi-friedericii</i> |
|                | <i>Cola greenwayi</i>            | <i>Macaranga capensis</i>        | <i>Macaranga capensis</i>        | <i>Craibia zimmermannii</i>      | <i>Syzygium guineense</i>        | <i>Craibia zimmermannii</i> | <i>Syzygium guineense</i>          |

|                   |                               |                               |                               |                               |                               |                                  |                               |
|-------------------|-------------------------------|-------------------------------|-------------------------------|-------------------------------|-------------------------------|----------------------------------|-------------------------------|
|                   | <i>Millettia oblata</i>       | <i>Celtis africana</i>        | <i>Rapanea melanophloeos</i>  | <i>Strombosia scheffleri</i>  | <i>Prunus africana</i>        | <i>Tabernaemontana stapfiana</i> | <i>Macaranga capensis</i>     |
| Plantation forest | <i>Eucalyptus sp.</i>            | <i>Eucalyptus sp.</i>         |
|                   | <i>Acacia mearnsii</i>        | <i>Cupressus lusitanica</i>   | <i>Pinus sp.</i>              | <i>Cupressus lusitanica</i>   | <i>Pinus sp.</i>              | <i>Pinus sp.</i>                 | <i>Pinus sp.</i>              |
|                   | <i>Cupressus lusitanica</i>   | <i>Pinus sp.</i>              | <i>Cupressus lusitanica</i>   | <i>Pinus sp.</i>              | <i>Cupressus lusitanica</i>   | <i>Cupressus lusitanica</i>      |                               |
|                   | <i>Pinus sp.</i>              | <i>Acacia mearnsii</i>        | <i>Grevillea robusta</i>      | <i>Grevillea robusta</i>      | <i>Xymalos monospora</i>      |                                  |                               |
|                   | <i>Macaranga capensis</i>     | <i>Vepris simplicifolia</i>   | <i>Acacia mearnsii</i>        |                               | <i>Acacia mearnsii</i>        |                                  |                               |
| Riverine forest   | <i>Vachellia xanthophloea</i> | <i>Vachellia xanthophloea</i> | <i>Newtonia hildebrandtii</i> | <i>Newtonia hildebrandtii</i> | <i>Vachellia xanthophloea</i> | <i>Newtonia hildebrandtii</i>    | <i>Newtonia hildebrandtii</i> |
|                   |                               | <i>Trichilia lepidota</i>     | <i>Vachellia xanthophloea</i> | <i>Cordia goetzei</i>         | <i>Newtonia hildebrandtii</i> | <i>Vachellia xanthophloea</i>    | <i>Vachellia xanthophloea</i> |
|                   |                               |                               |                               | <i>Vachellia xanthophloea</i> |                               |                                  |                               |

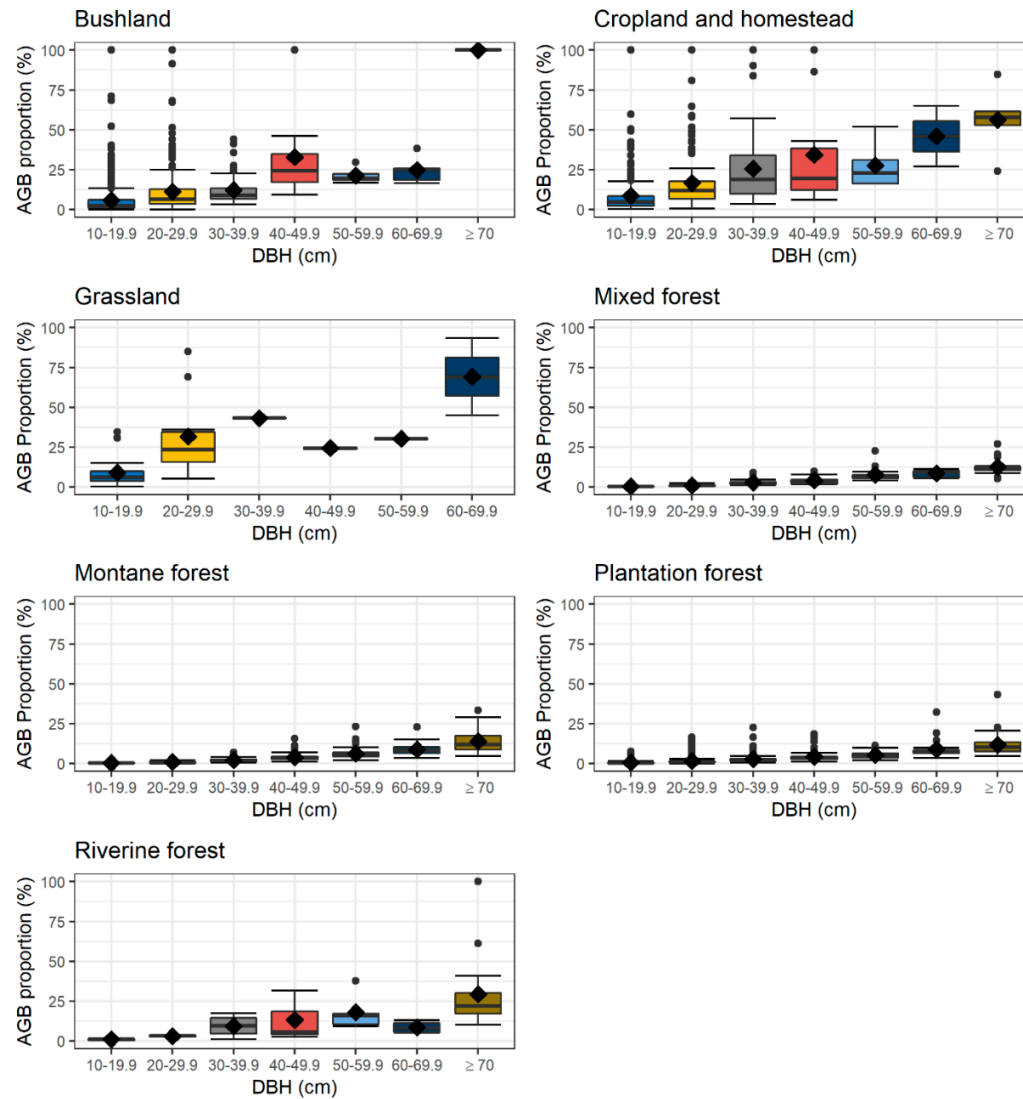

**Supplementary Figure S1.** Contribution (%) of diameter at breast height (DBH) classes to plot-level aboveground biomass (AGB) in different land cover (LC) types.

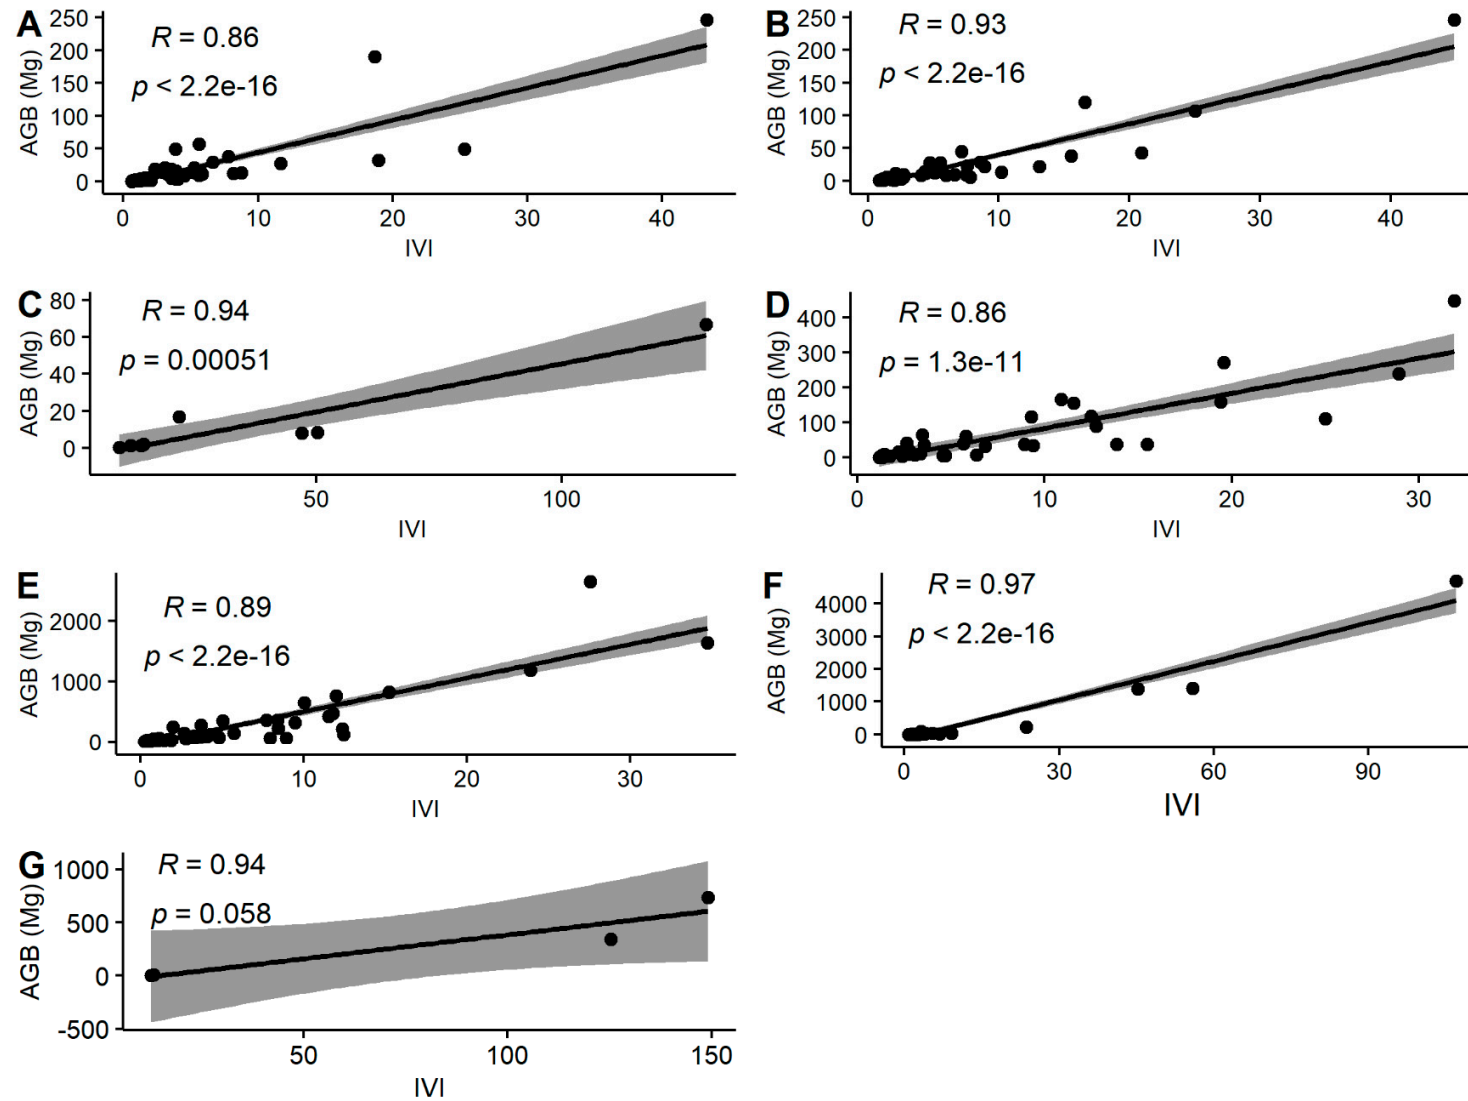

**Supplementary Figure S2.** Relationship between importance value index and aboveground biomass in the different LC types: (A) Bushland; (B) Cropland and homestead; (C) Grassland; (D) Mixed forest, (E) Montane forest; (F) Plantation forest; (G) Riverine forest.
